# Supplementary material
Source: Springer Nature journal article supplement (https://www.springermedizin.de/resource/supplementary/12985_2006_145_MOESM4_ESM.pdf/9607380)

6XHis

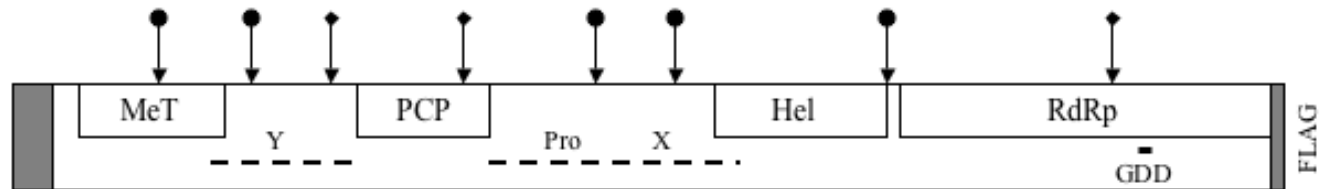

98 kDa

47 kDa

35 kDa

22 kDa

122 kDa

106 kDa

93 kDa

59 kDa

26 kDa

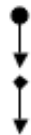

Cysteine protease site

Non-cysteine protease site

Supplement: MOESM4 [file 9607380]
